# Supplementary material for: Impact of CRISPR/Cas9-Mediated CD73 Knockout in Pancreatic Cancer
Source: MDPI journal article supplement (doi:10.3390/cancers15194842), 2023-10-03
Supplement: s1 [file s1]

| TB32047 Clones | Indel Size               | PANC1 Clones | Indel Size   |
|----------------|--------------------------|--------------|--------------|
| 1-9            | Delete 1bp               | 1-1          | Delete 5 bp  |
| 2-9            | Insert 1bp/ Delete 92bp  | 1-10         | Insert 265bp |
| 2-10           | Delete 2bp/ Delete 26 bp | 2-4          | Delete 11 bp |

|                           |                      |     |  |
|---------------------------|----------------------|-----|--|
| TB32047-WT or NC          |                      |     |  |
| NC_000075.7 37155-37174bp |                      |     |  |
| 5'-                       | GAAGCGGCACGTCTGAGTGG | -3' |  |
|                           |                      |     |  |
| 3'-                       | CTTCGCCGTGCAGACTCACC | -5' |  |

|                            |                      |     |  |
|----------------------------|----------------------|-----|--|
| TB32047-SC1-9              |                      |     |  |
| Mutation: Deletion of 1 bp |                      |     |  |
| 5'-                        | GAA-CGGCACGTCTGAGTGG | -3' |  |
|                            |                      |     |  |
| 3'-                        | CTT-GCCGTGCAGACTCACC | -5' |  |

|                           |                      |     |  |
|---------------------------|----------------------|-----|--|
| TB32047-WT or NC          |                      |     |  |
| NC_000075.7 24759-24778bp |                      |     |  |
| 5'-                       | GATATCTGATGTGCTAGAGG | -3' |  |
|                           |                      |     |  |
| 3'-                       | CTATAGACTACACGATCTCC | -5' |  |

|                              |                                    |     |  |
|------------------------------|------------------------------------|-----|--|
| TB32047-SC2-9                |                                    |     |  |
| Mutation 1: Insertion of 1bp |                                    |     |  |
| 5'-                          | GATA <sup>A</sup> TCTGATGTGCTAGAGG | -3' |  |
|                              |                                    |     |  |
| 3'-                          | CTAT <sup>T</sup> AGACTACACGATCTCC | -5' |  |

|                             |                      |     |  |
|-----------------------------|----------------------|-----|--|
| TB32047-SC2-10              |                      |     |  |
| Mutation 2: Deletion of 2bp |                      |     |  |
| 5'-                         | GATAT--GATGTGCTAGAGG | -3' |  |
|                             |                      |     |  |
| 3'-                         | CTATA--CTACACGATCTCC | -5' |  |

|                              |  |  |  |
|------------------------------|--|--|--|
| TB32047-SC2-9                |  |  |  |
| Mutation 3: Deletion of 92bp |  |  |  |
| TB32047-SC2-10               |  |  |  |
| Mutation 4: Deletion of 26bp |  |  |  |

---

PANC-1-WT or NC  
NC\_000006.12 374-393bp

---

|     |                      |     |
|-----|----------------------|-----|
| 5'- | CGCCCTGCGCTACGATGCCA | -3' |
|     |                      |     |
| 3'- | GCGGGACGCGATGCTACGGT | -5' |

---

---

PANC-1-SC1-1  
Mutation: Deletion of 5 bp

---

|     |                      |     |
|-----|----------------------|-----|
| 5'- | CGCCCTGCGCTACGATG--- | -3' |
|     |                      |     |
| 3'- | GCGGGACGCGATGCTAC--- | -5' |

---

---

PANC-1-SC1-10  
Mutation: Insertion of 256 bp

---

|     |                       |     |
|-----|-----------------------|-----|
| 5'- | CGCCCTGCGCTACGATG-CCA | -3' |
|     |                       |     |
| 3'- | GCGGGACGCGATGCTAC-GGT | -5' |

---

---

PANC-1-WT or NC  
NC\_000006.12 21295-21314bp

---

|     |                     |     |
|-----|---------------------|-----|
| 5'- | CCCACCACGACGTCCACAC | -3' |
|     |                     |     |
| 3'- | GGGTGGTGCTGCAGGTGTG | -5' |

---

---

PANC-1-SC2-4  
Mutation: Deletion of 11 bp

---

|     |                       |     |
|-----|-----------------------|-----|
| 5'- | C C C ----- C A C A C | -3' |
|     |                       |     |
| 3'- | G G G ----- G T G T G | -5' |

---
