# Supplementary material for: Impact of CRISPR/Cas9-Mediated CD73 Knockout in Pancreatic Cancer
Source: MDPI journal article supplement (doi:10.3390/cancers15194842), 2023-10-03
Supplement: s1 [file s1]

| <b>Primer target</b> | <b>Direction</b> | <b>Sequences (5'-&gt;3')</b> |
|----------------------|------------------|------------------------------|
| Ho_CD73              | Forward          | CCAGTACCAGGGCACTATCTG        |
| Ho_CD73              | Reverse          | TGGCTCGATCAGTCCTTCCA         |
| Ho_CD80              | Forward          | GGCCCGAGTACAAGAACCG          |
| Ho_CD80              | Reverse          | TCGTATGTGCCCTCGTCAGAT        |
| Ho_CD154             | Forward          | ACATACAACCAAACCTTCTCCCCG     |
| Ho_CD154             | Reverse          | GCAAAAAGTGCTGACCCAATCA       |
| Ho_CD252             | Forward          | GGTCAGGTCTGTCAACTCCTT        |
| Ho_CD252             | Reverse          | CATCCAGGGAGGTATTGTCAGT       |
| Ho_CD276             | Forward          | TCACAGGGCAGCCTATGAC          |
| Ho_CD276             | Reverse          | TCCTCAGCTCCTGCATTCTC         |
| Mm_CD73              | Forward          | ATGCCGGAGACCAGTACCA          |
| Mm_CD73              | Reverse          | CAGTGCCATAGCATCGTAGCC        |
| Mm_CD80              | Forward          | ACCCCCAACATAACTGAGTCT        |
| Mm_CD80              | Reverse          | TTCCAACCAAGAGAAGCGAGG        |
| Mm_CD154             | Forward          | CTTCTGCTCTAATCGGGAGCC        |
| Mm_CD154             | Reverse          | GCCGCCTTGAGTAAGATTCTC        |
| Mm_CD276             | Forward          | GGACCTACGTCCAGGGAACAT        |
| Mm_CD276             | Reverse          | TGGTCACATTGCCAGTCAAGG        |
| Ho_GAPDH             | Forward          | CTTTGGTATCGTGGAAGGACTC       |
| Ho_GAPDH             | Reverse          | AGTAGAGGCAGGGATGATGT         |
| Ho_β-Actin           | Forward          | CACCATTGGCAATGAGCGGTTC       |
| Ho_β-Actin           | Reverse          | AGGTCTTTGCGGATGTCCACGT       |
| Mm_GAPDH             | Forward          | AGGTCGGTGTGAACGGATTTG        |
| Mm_GAPDH             | Reverse          | TGTAGACCATGTAGTTGAGGTCA      |
| Mm_β-Actin           | Forward          | GTGACGTTGACATCCGTAAAGA       |
| Mm_β-Actin           | Reverse          | GCCGGACTCATCGTACTC           |
