# Supplementary material for: Impact of CRISPR/Cas9-Mediated CD73 Knockout in Pancreatic Cancer
Source: MDPI journal article supplement (doi:10.3390/cancers15194842), 2023-10-03
Supplement: s1 [file s1]

| <b>Plasmid</b>                   | <b>Source</b>      |
|----------------------------------|--------------------|
| lentiCas9-Blast                  | RRID:Addgene_52962 |
| lentiGuide-Puro                  | RRID:Addgene_52963 |
| Mouse Brie kinome pooled library | RRID:Addgene_75316 |
| pMDLg/pRRE                       | RRID:Addgene_12251 |
| pRSV-REV                         | RRID:Addgene_12253 |
| pMD2.G                           | RRID:Addgene_12259 |
| pSpCas9(BB)-2A-Puro (PX459) V2.0 | RRID:Addgene_62988 |
