# Supplementary material for: Impact of CRISPR/Cas9-Mediated CD73 Knockout in Pancreatic Cancer
Source: MDPI journal article supplement (doi:10.3390/cancers15194842), 2023-10-03
Supplement: s1 [file s1]

| <b>sgRNA</b>      | <b>Direction</b> | <b>Sequences (5'-&gt;3')</b> |
|-------------------|------------------|------------------------------|
| Ho_CD73_sg1_check | Forward          | ACCAGCGAGGACTCCAGCAA         |
| Ho_CD73_sg1_check | Reverse          | AATCGTCCAAGGGACTTCTATGC      |
| Ho_CD73_sg2_check | Forward          | TTTGGTTTTACTGACTCTTGAGC      |
| Ho_CD73_sg2_check | Reverse          | ATCCTTTTGAAACAATTACCTGTG     |
| Mm_CD73_sg1_check | Forward          | CCTTTCCTCCCTCCCTAGACGC       |
| Mm_CD73_sg1_check | Reverse          | GCCACAACCAAAATGCACAGATG      |
| Mm_CD73_sg2_check | Forward          | TACTTAGGCACTGGGAAATCAT       |
| Mm_CD73_sg2_check | Reverse          | ACAAAGAAGTTCACCGAGCAGA       |
