# Supplementary material for: Impact of CRISPR/Cas9-Mediated CD73 Knockout in Pancreatic Cancer
Source: MDPI journal article supplement (doi:10.3390/cancers15194842), 2023-10-03
Supplement: s1 [file s1]

| Source            | Antibodies                               | Species        | Identifier                    | Note      |
|-------------------|------------------------------------------|----------------|-------------------------------|-----------|
| Cell<br>signaling | NT5E/CD73                                | Human,<br>Maus | Cat# 13160<br>RRID:AB_2716625 | 70 kDa    |
|                   | Vinculin                                 | Human,<br>Maus | Cat# 13901<br>RRID:AB_2728768 | 124 kDa   |
|                   | GAPDH                                    | Human,<br>Maus | Cat# 5174<br>RRID:AB_10622025 | 37 kDa    |
|                   | P44/42<br>MAPK(Erk1/2)                   | Human,<br>Maus | Cat# 4695<br>RRID:AB_390779   | 44/42 kDa |
|                   | AKT-pan                                  | Human,<br>Maus | Cat# 4691<br>RRID:AB_915783   | 60 kDa    |
|                   | Stat3                                    | Human,<br>Maus | Cat# 12640<br>RRID:AB_2629499 | 86 kDa    |
|                   | p-AKT                                    | Human,<br>Maus | Cat# 4060<br>RRID:AB_2315049  | 60 kDa    |
|                   | p-Stat3                                  | Human,<br>Maus | Cat# 9145<br>RRID:AB_2491009  | 86 kDa    |
|                   | Phospho-<br>p44/42<br>MAPK(p-<br>Erk1/2) | Human,<br>Maus | Cat# 4370<br>RRID:AB_2315112  | 44/42 kDa |
|                   | E-Cadherin                               | Human,<br>Maus | Ca#3195<br>RRID:AB_2291471    | 135 kDa   |
|                   | HRP-linked<br>anti-rabbit IgG            | Human,<br>Maus | Cat# 7074<br>RRID:AB_2099233  | /         |
|                   | HRP-linked<br>anti-mouse IgG             | Human,<br>Maus | Cat# 7076<br>RRID:AB_330924   | /         |
