# Supplementary material for: Impact of CRISPR/Cas9-Mediated CD73 Knockout in Pancreatic Cancer
Source: MDPI journal article supplement (doi:10.3390/cancers15194842), 2023-10-03
Supplement: s1 [file s1]

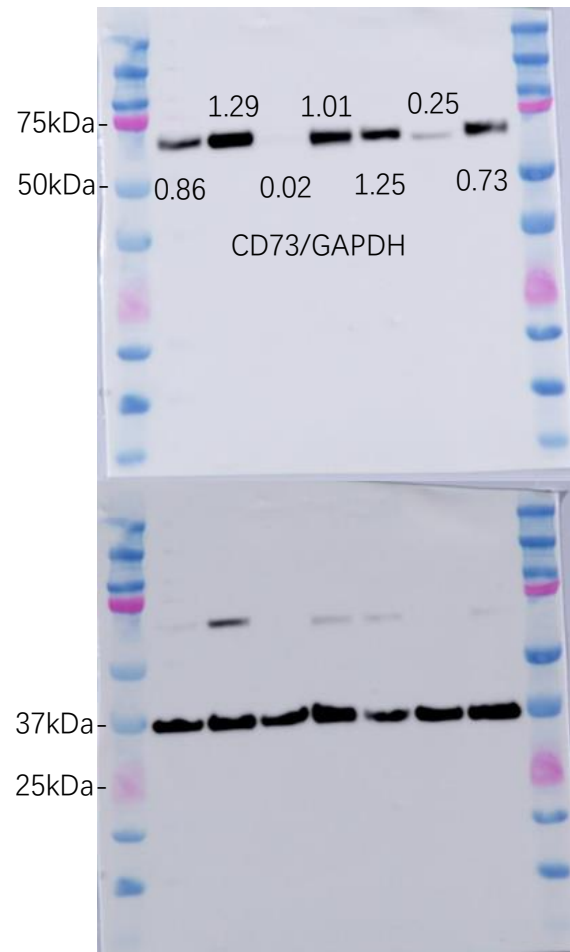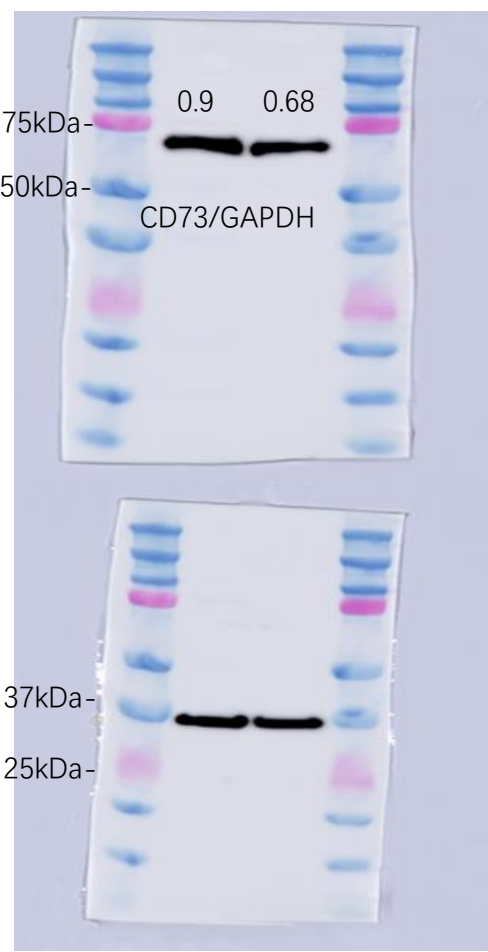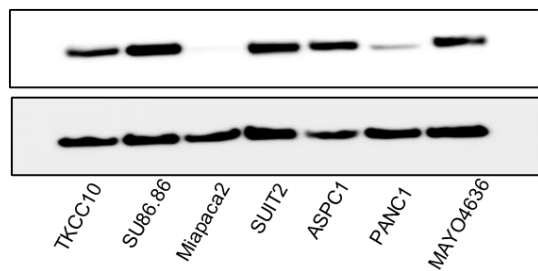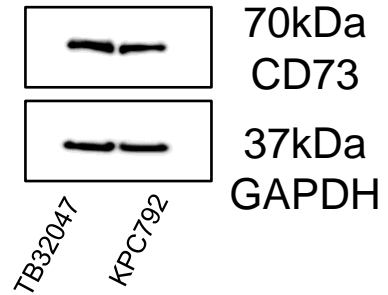

## TB-CD73

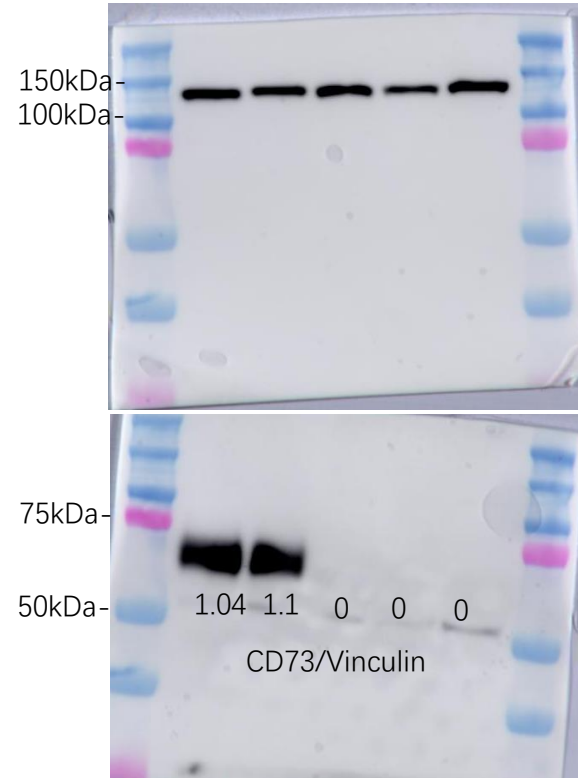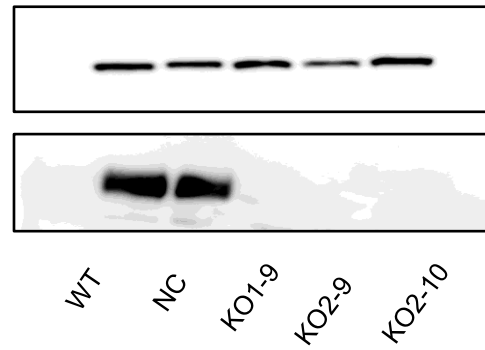

## PANC1-CD73

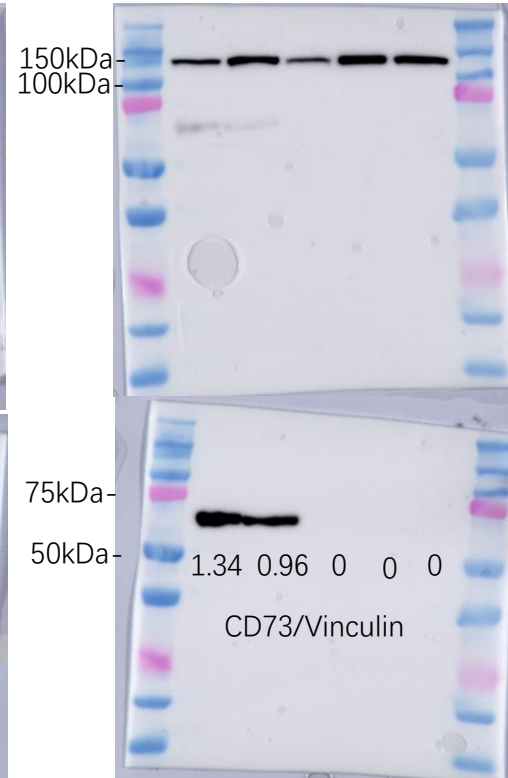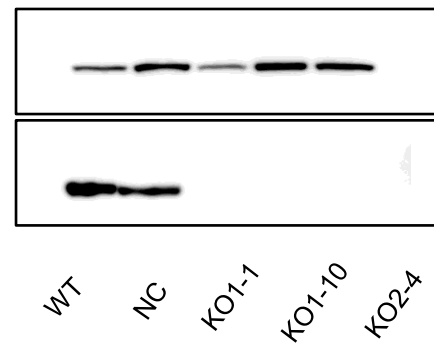

124kDa  
vinculin

70kDa  
CD73

TB-stat3

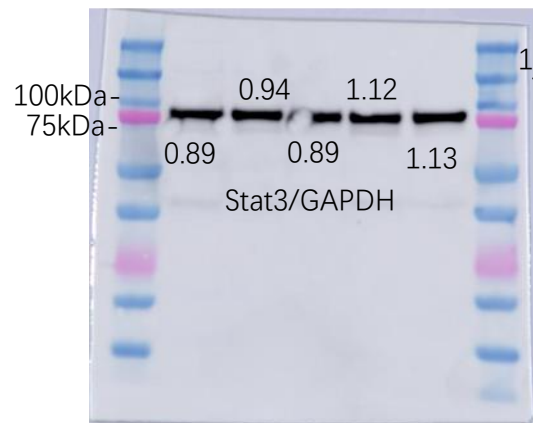

TB-Pho-stat3

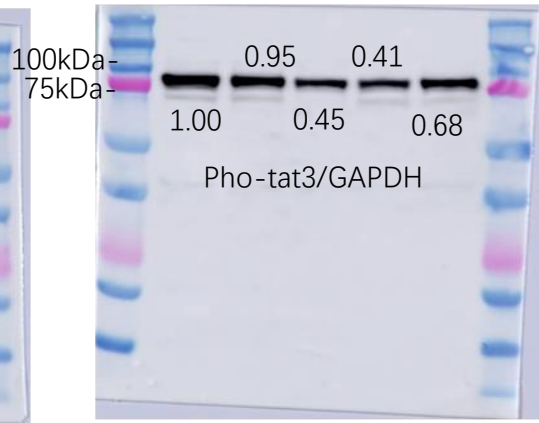

PANC1-stat3

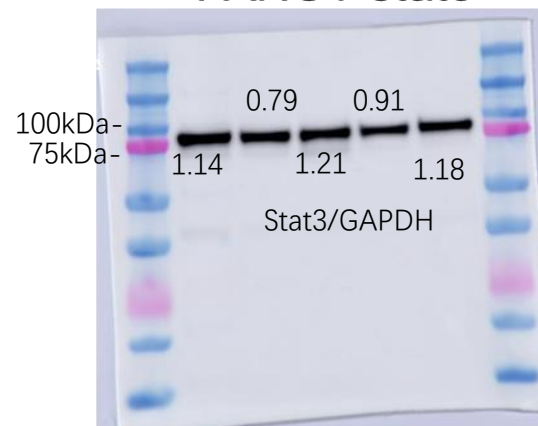

PANC1-Pho-stat3

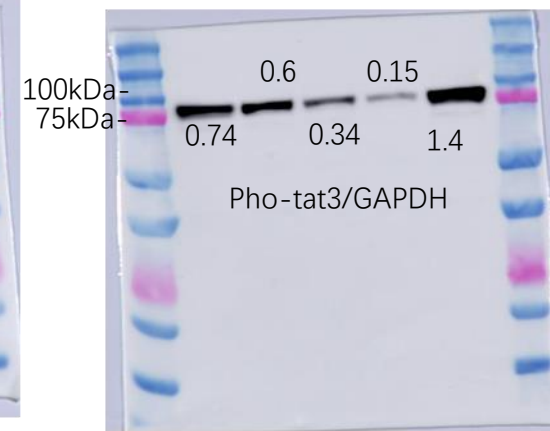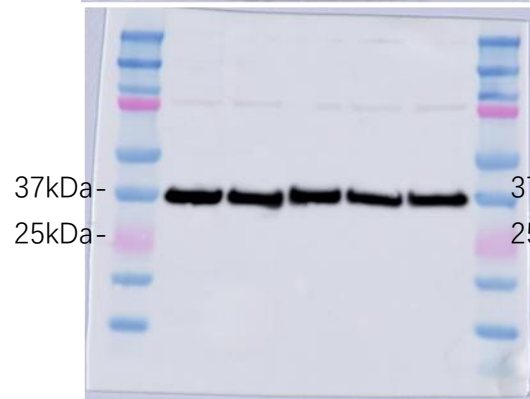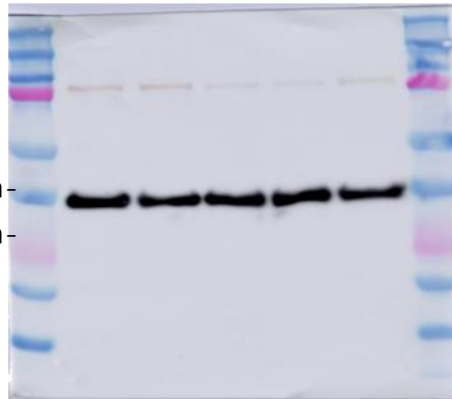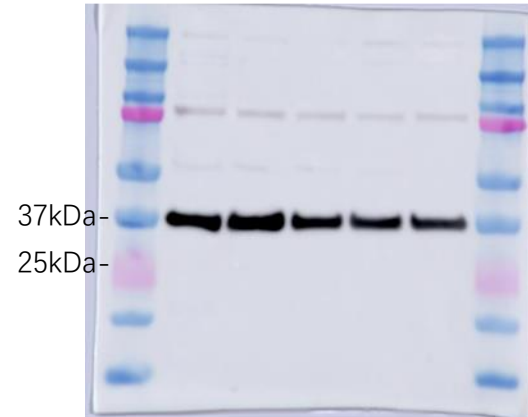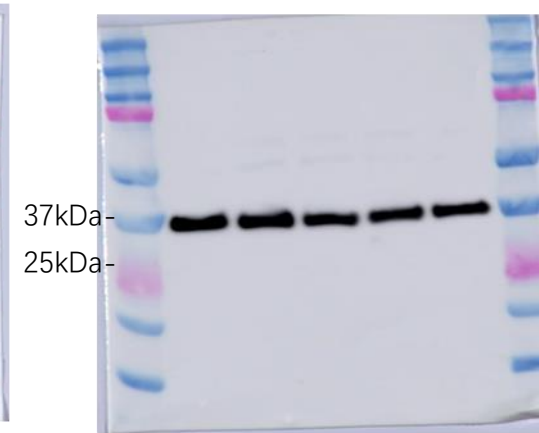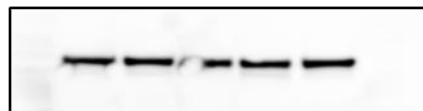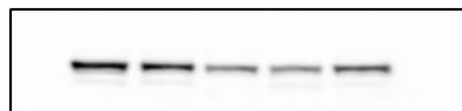

86kDa  
stat3/Pho-stat3

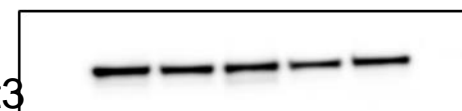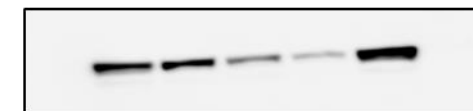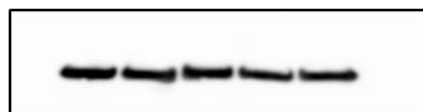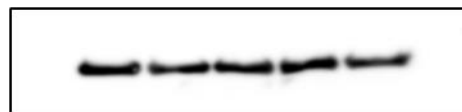

37kDa  
GAPDH

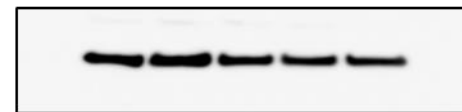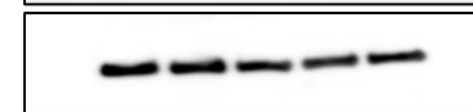

WT NC KO1-9 KO2-9 KO2-10

WT NC KO1-9 KO2-9 KO2-10

WT NC KO1-1 KO1-10 KO2-4

WT NC KO1-1 KO1-10 KO2-4

TB-AKT

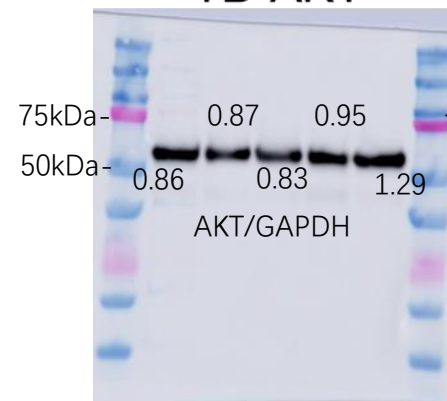

TB-Pho-AKT

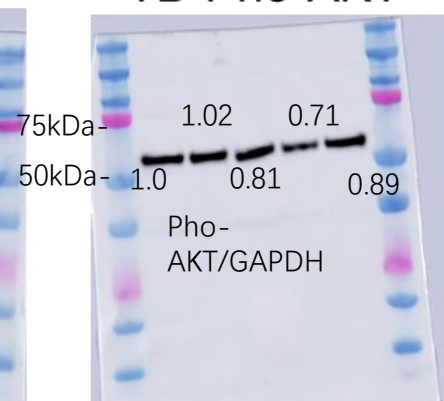

PANC1-AKT

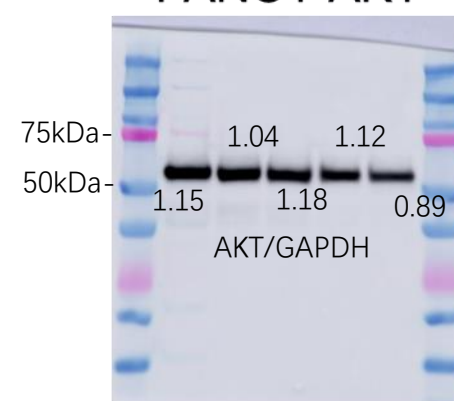

PANC1-Pho-AKT

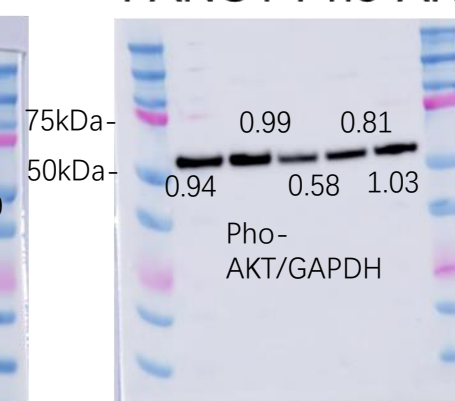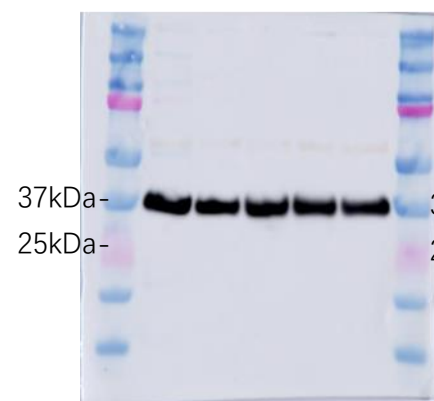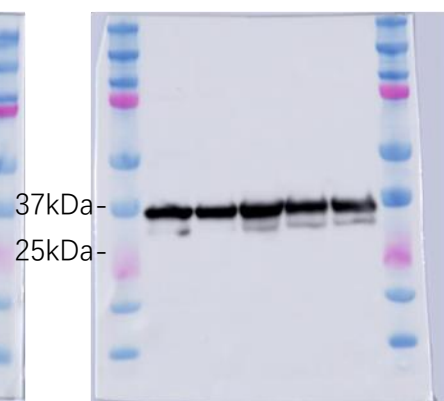

60kDa  
AKT/Pho-  
AKT

37kDa  
GAPDH

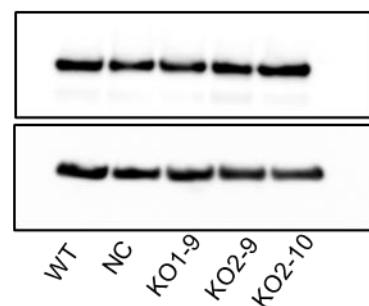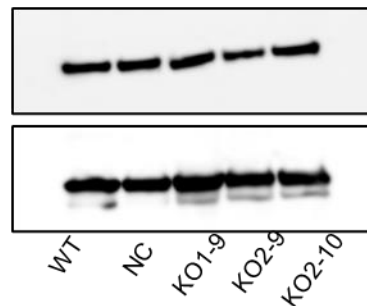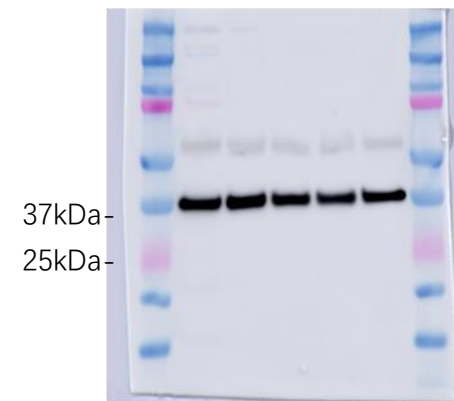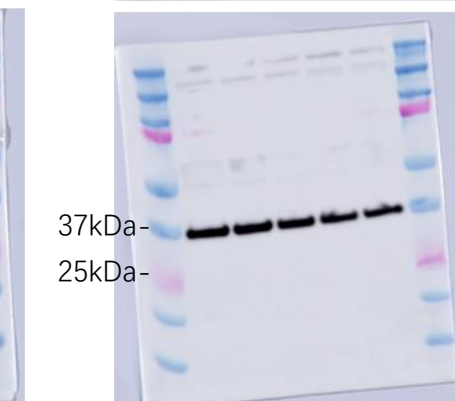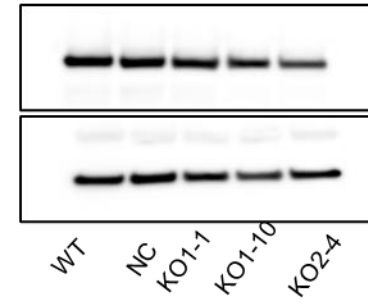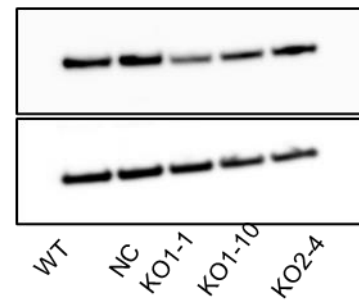

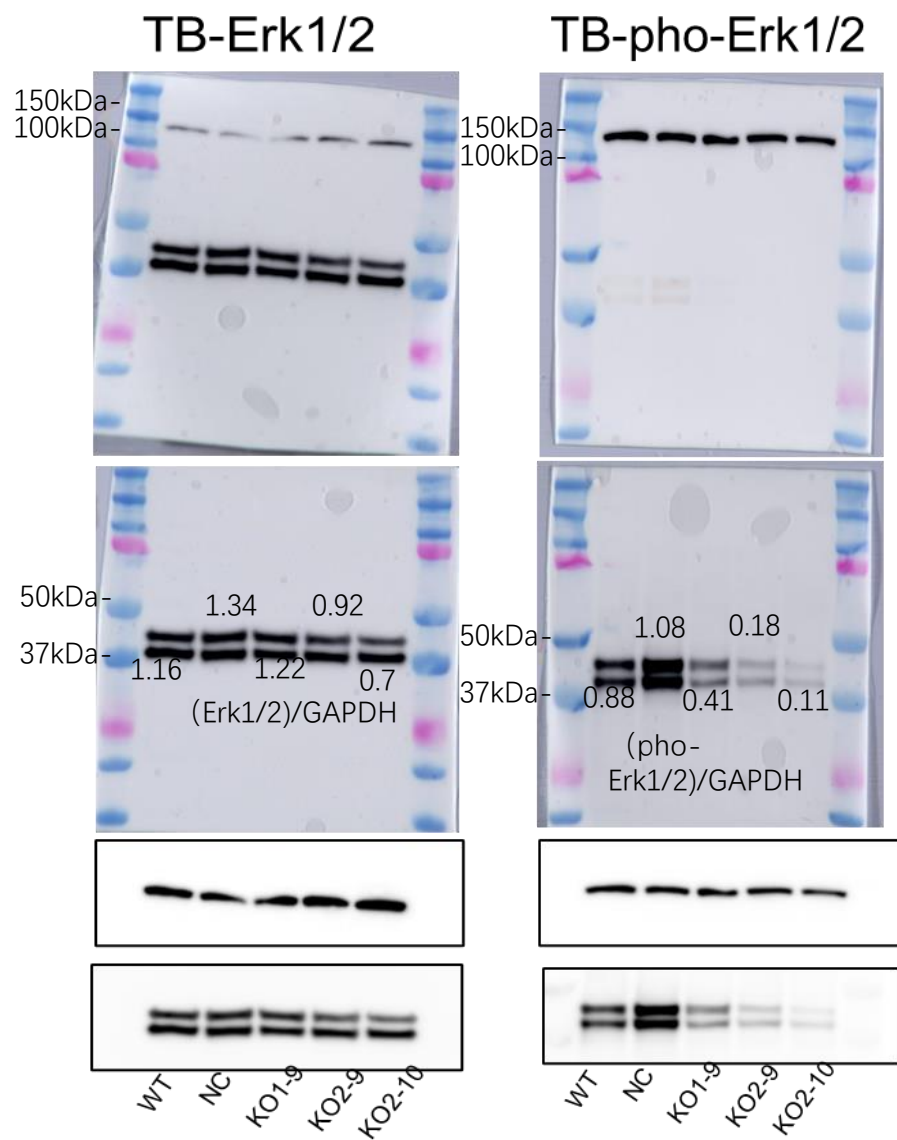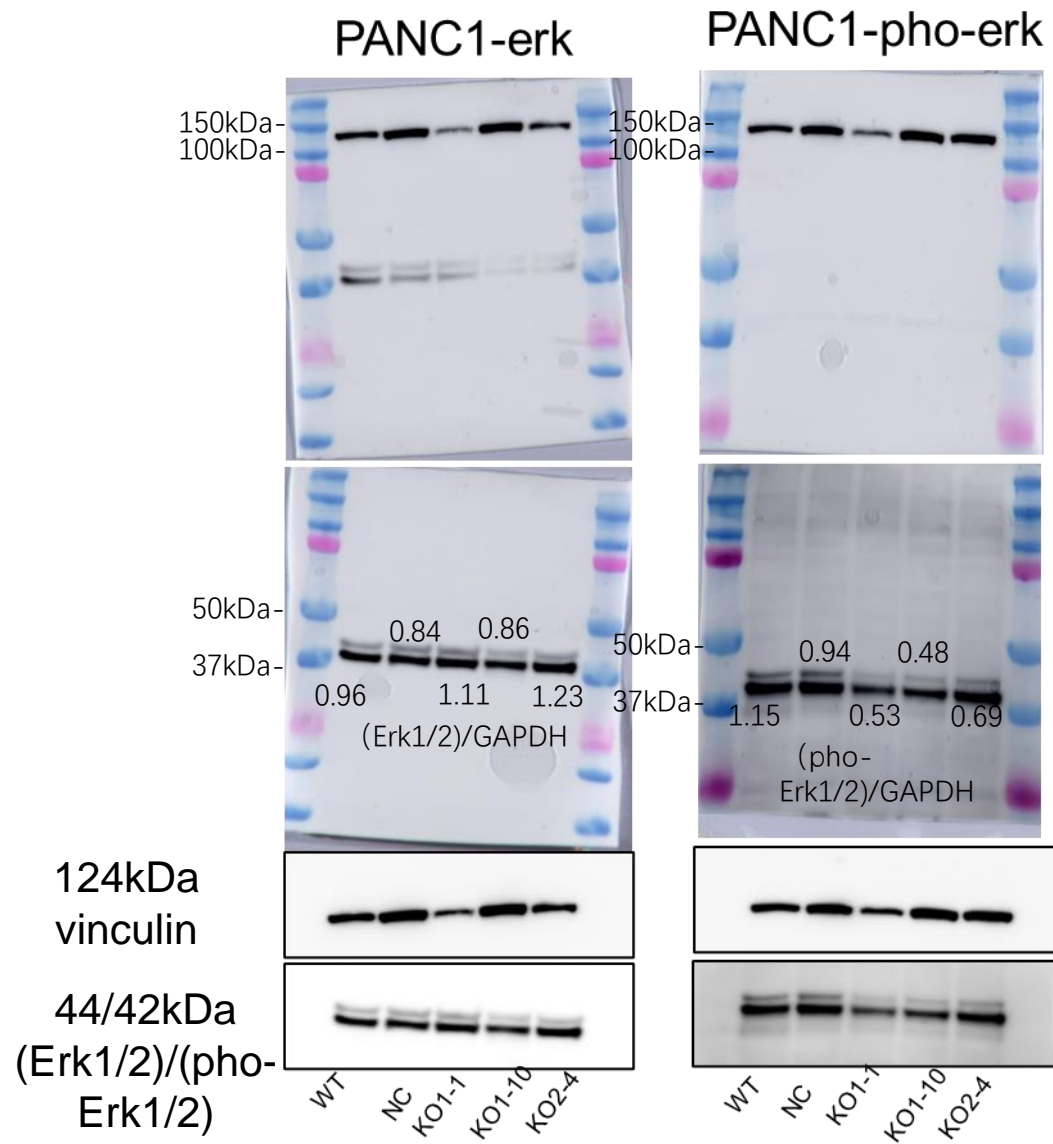

## TB-CD73-high

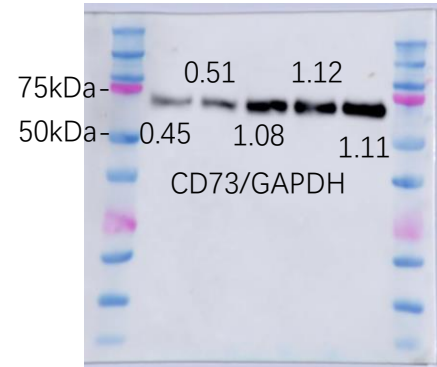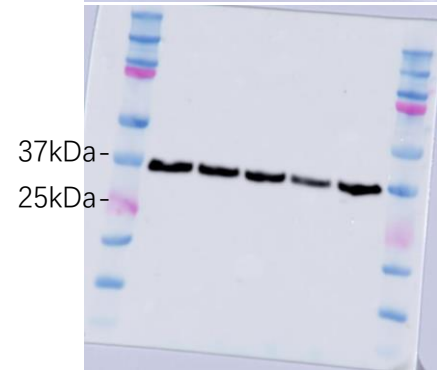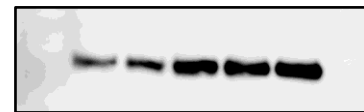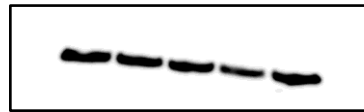

70kDa  
CD73

37kDa  
GAPDH

WT Cas9 Lib-1 Lib-2 Lib-3
