# Supplementary material for: Impact of CRISPR/Cas9-Mediated CD73 Knockout in Pancreatic Cancer
Source: MDPI journal article supplement (doi:10.3390/cancers15194842), 2023-10-03
Supplement: s1 [file s1]

|    |       |       |                                 |       |
|----|-------|-------|---------------------------------|-------|
| BD | CD73  | Human | Cat# 561014<br>RRID:AB_2033967  | PE    |
|    | CD80  | Human | Cat# 564158<br>RRID:AB_2738630  | BV650 |
|    | CD154 | Human | Cat# 566268<br>RRID:AB_2739646  | BV421 |
|    | CD252 | Human | Cat# 563766<br>RRID:AB_2738412  | BV421 |
|    | CD276 | Human | Cat# 565829<br>RRID:AB_2739369  | BV421 |
|    | CD73  | Maus  | Cat# 550741<br>RRID:AB_393860   | PE    |
|    | CD80  | Maus  | Cat# 563687<br>RRID:AB_2738376  | BV650 |
|    | CD154 | Maus  | Cat# 561719<br>RRID:AB_10897018 | PE    |
|    | CD252 | Maus  | Cat# 565341<br>RRID:AB_2739194  | BV421 |
|    | CD276 | Maus  | Cat# 563634<br>RRID:AB_2738336  | BV421 |
